# Supplementary material for: Variation in Bioactive Compounds and Antioxidant Activity of Rubus Fruits at Different Developmental Stages
Source: MDPI journal article supplement (doi:10.3390/foods11081169), 2022-04-18
Supplement: s1 [file s1]

## Supplementary Materials

**Table S1.** The protein content of different *Rubus* cultivars at different developmental stages.

| Cultivar     | Period       |                |              |               |             |
|--------------|--------------|----------------|--------------|---------------|-------------|
|              | Green        | Green-red      | Red          | Red-purple    | Purple      |
| Chester      | 3.73±0.51aB  | 3.05±0.20bA    | 1.33±0.13dB  | 1.39±0.22dA   | 2.06±0.20cA |
| Hull         | 2.92±0.56aC  | 0.95±0.20bcCD  | 0.46±0.16cD  | 0.95±0.30bcB  | 1.34±0.36bB |
| Boysen       | 2.36±0.31aCD | 0.75±0.20cD    | 0.83±0.15cCD | 1.06±0.06bcBC | 1.30±0.28bB |
| Young        | 1.43±0.12aE  | 1.03±0.24bcBCD | 0.92±0.27bcC | 1.24±0.06abBC | 0.86±0.20cB |
| Clode Summit | 0.94±0.22bE  | Multicolor     | Yellow       |               |             |
| Heritage     | 2.16±0.36aD  | 1.36±0.11bB    | 1.22±0.09bBC | 1.29±0.16bBC  |             |
| Bristol      | 4.70±0.32aA  | 1.17±0.19bcBC  | 0.84±0.17cCD | 1.00±0.28bc   | 1.34±0.27bB |

Note: Different lowercase letters (a–d) in columns denote significant differences between sampling dates for each cultivar fruits by Duncan's multiple range test ( $p < 0.05$ ). Different capital letters (A–E) in columns denote significant differences by Duncan's multiple range test ( $p < 0.05$ ) among different cultivars.

**Table S2.** Correlation of biologically active substances and antioxidant capacity in 'Chester' fruits.

|               | Fructose | Glucose | Soluble sugar | Vitamin C | Vitamin E | Flavonoids | Anthocyanins | Phenols | DPPH |
|---------------|----------|---------|---------------|-----------|-----------|------------|--------------|---------|------|
| Fructose      | 1        |         |               |           |           |            |              |         |      |
| Glucose       | .976**   | 1       |               |           |           |            |              |         |      |
| Soluble sugar | .964**   | .911**  | 1             |           |           |            |              |         |      |
| Vitamin C     | -0.029   | -0.186  | -0.01         | 1         |           |            |              |         |      |
| Vitamin E     | -.738*   | -.840** | -.695*        | .672*     | 1         |            |              |         |      |
| Flavonoids    | -0.488   | -0.627  | -0.443        | .873**    | .935**    | 1          |              |         |      |
| Anthocyanins  | .975**   | .945**  | .990**        | -0.112    | -.775**   | -0.536     | 1            |         |      |
| Phenols       | -0.354   | -0.475  | -0.377        | .919**    | .862**    | .957**     | -0.461       | 1       |      |
| DPPH          | -0.502   | -.633*  | -0.48         | .868**    | .941**    | .992**     | -0.57        | .973**  | 1    |

Note: “\*” denotes significant differences between various indicators by Duncan's multiple range test ( $p < 0.05$ ). “\*\*” denotes significant differences between various indicators by Duncan's multiple range test ( $p < 0.01$ ).

**Table S3.** Correlation of biologically active substances and antioxidant capacity in 'Hull' fruits.

|               | Fructose | Glucose | Soluble sugar | Vitamin C | Vitamin E | Flavonoids | Anthocyanins | Phenols | DPPH |
|---------------|----------|---------|---------------|-----------|-----------|------------|--------------|---------|------|
| Fructose      | 1        |         |               |           |           |            |              |         |      |
| Glucose       | .997**   | 1       |               |           |           |            |              |         |      |
| Soluble sugar | .999**   | .995**  | 1             |           |           |            |              |         |      |
| Vitamin C     | -0.278   | -0.286  | -0.29         | 1         |           |            |              |         |      |
| Vitamin E     | -0.071   | -0.098  | -0.069        | .862**    | 1         |            |              |         |      |
| Flavonoids    | -0.441   | -0.471  | -0.435        | .778**    | .900**    | 1          |              |         |      |
| Anthocyanins  | .987**   | .976**  | .992**        | -0.302    | -0.044    | -0.393     | 1            |         |      |
| Phenols       | -0.473   | -0.48   | -0.481        | .947**    | .866**    | .896**     | -0.487       | 1       |      |
| DPPH          | -0.499   | -0.504  | -0.508        | .962**    | .821**    | .842**     | -0.518       | .989**  | 1    |

Note: “\*” denotes significant differences between various indicators by Duncan's multiple range test ( $p < 0.05$ ). “\*\*” denotes significant differences between various indicators by Duncan's multiple range test ( $p < 0.01$ ).

**Table S4.** Correlation of biologically active substances and antioxidant capacity in 'Boysen' fruits.

|               | Fructose | Glucose | Soluble sugar | Vitamin C | Vitamin E | Flavonoids | Anthocyanins | Phenols | DPPH |
|---------------|----------|---------|---------------|-----------|-----------|------------|--------------|---------|------|
| Fructose      | 1        |         |               |           |           |            |              |         |      |
| Glucose       | .953**   | 1       |               |           |           |            |              |         |      |
| Soluble sugar | .938**   | .866**  | 1             |           |           |            |              |         |      |
| Vitamin C     | 0.137    | 0.03    | -0.002        | 1         |           |            |              |         |      |
| Vitamin E     | -.731*   | -.664*  | -.891**       | 0.343     | 1         |            |              |         |      |
| Flavonoids    | -0.391   | -0.289  | -.677*        | 0.384     | .854**    | 1          |              |         |      |
| Anthocyanins  | 0.592    | 0.614   | 0.547         | -0.53     | -.664*    | -0.306     | 1            |         |      |
| Phenols       | -0.386   | -0.3    | -.676*        | 0.368     | .853**    | .993**     | -0.265       | 1       |      |
| DPPH          | -0.338   | -0.223  | -.637*        | 0.335     | .811**    | .995**     | -0.22        | .989**  | 1    |

Note: “\*” denotes significant differences between various indicators by Duncan's multiple range test ( $p < 0.05$ ). “\*\*” denotes significant differences between various indicators by Duncan's multiple range test ( $p < 0.01$ ).

**Table S5.** Correlation of biologically active substances and antioxidant capacity in 'Young' fruits.

|               | Fructose | Glucose | Soluble sugar | Vitamin C | Vitamin E | Flavonoids | Anthocyanins | Phenols | DPPH |
|---------------|----------|---------|---------------|-----------|-----------|------------|--------------|---------|------|
| Fructose      | 1        |         |               |           |           |            |              |         |      |
| Glucose       | .991**   | 1       |               |           |           |            |              |         |      |
| Soluble sugar | .922**   | .882**  | 1             |           |           |            |              |         |      |
| Vitamin C     | -0.57    | -0.616  | -0.472        | 1         |           |            |              |         |      |
| Vitamin E     | -0.475   | -0.43   | -.666*        | 0.547     | 1         |            |              |         |      |
| Flavonoids    | -0.268   | -0.222  | -0.507        | 0.483     | .970**    | 1          |              |         |      |
| Anthocyanins  | .991**   | .968**  | .941**        | -0.547    | -0.554    | -0.35      | 1            |         |      |
| Phenols       | -.707*   | -.640*  | -.890**       | 0.338     | .853**    | .750*      | -.777**      | 1       |      |
| DPPH          | -0.58    | -0.526  | -.822**       | 0.455     | .904**    | .866**     | -.636*       | .919**  | 1    |

Note: “\*” denotes significant differences between various indicators by Duncan's multiple range test ( $p < 0.05$ ). “\*\*” denotes significant differences between various indicators by Duncan's multiple range test ( $p < 0.01$ ).

**Table S6.** Correlation of biologically active substances and antioxidant capacity in 'Clode Summit' fruits.

|               | Fructose | Glucose | Soluble sugar | Vitamin C | Vitamin E | Flavonoids | Anthocyanins | Phenols | DPPH |
|---------------|----------|---------|---------------|-----------|-----------|------------|--------------|---------|------|
| Fructose      | 1        |         |               |           |           |            |              |         |      |
| Glucose       | .976**   | 1       |               |           |           |            |              |         |      |
| Soluble sugar | .977**   | .981**  | 1             |           |           |            |              |         |      |
| Vitamin C     | .988**   | .983**  | .975**        | 1         |           |            |              |         |      |
| Vitamin E     | -0.725   | -0.79   | -0.803        | -0.683    | 1         |            |              |         |      |
| Flavonoids    | -0.357   | -0.461  | -0.491        | -0.315    | .899*     | 1          |              |         |      |
| Anthocyanins  | .950**   | .969**  | .975**        | .928**    | -.902*    | -0.627     | 1            |         |      |
| Phenols       | -0.662   | -0.735  | -0.755        | -0.62     | .996**    | .935**     | -.861*       | 1       |      |
| DPPH          | -.885*   | -.914*  | -.932**       | -.851*    | .949**    | 0.731      | -.982**      | .922**  | 1    |

Note: “\*” denotes significant differences between various indicators by Duncan's multiple range test ( $p < 0.05$ ). “\*\*” denotes significant differences between various indicators by Duncan's multiple range test ( $p < 0.01$ ).

**Table S7.** Correlation of biologically active substances and antioxidant capacity in 'Heritage' fruits.

|               | Fructose | Glucose | Soluble sugar | Vitamin C | Vitamin E | Flavonoids | Anthocyanins | Phenols | DPPH |
|---------------|----------|---------|---------------|-----------|-----------|------------|--------------|---------|------|
| Fructose      | 1        |         |               |           |           |            |              |         |      |
| Glucose       | .975**   | 1       |               |           |           |            |              |         |      |
| Soluble sugar | .984**   | .971**  | 1             |           |           |            |              |         |      |
| Vitamin C     | -0.507   | -0.554  | -0.421        | 1         |           |            |              |         |      |
| Vitamin E     | -.719*   | -.771*  | -0.643        | .908**    | 1         |            |              |         |      |
| Flavonoids    | -.725*   | -.806*  | -0.674        | .795*     | .960**    | 1          |              |         |      |
| Anthocyanins  | .930**   | .911**  | .969**        | -0.205    | -0.453    | -0.508     | 1            |         |      |
| Phenols       | -.810*   | -.875** | -.767*        | .788*     | .959**    | .990**     | -0.612       | 1       |      |
| DPPH          | -.813*   | -.875** | -.771*        | .784*     | .954**    | .987**     | -0.618       | .999**  | 1    |

Note: "\*" denotes significant differences between various indicators by Duncan's multiple range test ( $p < 0.05$ ). "\*\*\*" denotes significant differences between various indicators by Duncan's multiple range test ( $p < 0.01$ ).

**Table S8.** Correlation of biologically active substances and antioxidant capacity in 'Bristol' fruits.

|               | Fructose | Glucose | Soluble sugar | Vitamin C | Vitamin E | Flavonoids | Anthocyanins | Phenols | DPPH |
|---------------|----------|---------|---------------|-----------|-----------|------------|--------------|---------|------|
| Fructose      | 1        |         |               |           |           |            |              |         |      |
| Glucose       | .991**   | 1       |               |           |           |            |              |         |      |
| Soluble sugar | .979**   | .957**  | 1             |           |           |            |              |         |      |
| Vitamin C     | .707*    | .676*   | .821**        | 1         |           |            |              |         |      |
| Vitamin E     | .678*    | .732*   | 0.522         | 0.069     | 1         |            |              |         |      |
| Flavonoids    | -0.368   | -0.294  | -0.52         | -.712*    | 0.388     | 1          |              |         |      |
| Anthocyanins  | .847**   | .824**  | .775**        | 0.302     | .729*     | -0.152     | 1            |         |      |
| Phenols       | -0.339   | -0.265  | -0.481        | -.636*    | 0.385     | .993**     | -0.172       | 1       |      |
| DPPH          | -.857**  | -.823** | -.934**       | -.925**   | -0.268    | 0.599      | -0.565       | 0.529   | 1    |

Note: “\*” denotes significant differences between various indicators by Duncan's multiple range test ( $p < 0.05$ ). “\*\*” denotes significant differences between various indicators by Duncan's multiple range test ( $p < 0.01$ ).
